# Supplementary material
Source: PubMed Central journal article supplement (PMC6363846)
Supplement: NIHMS1516865-supplement-1.pdf [file NIHMS1516865-supplement-1.pdf]

**Supplemental Table 1. GUCY2C-Specific VDJ Usage in *Gucy2c*<sup>-/-</sup> and Retrogenic Mice.**

| Frequency Rank <sup>a</sup>                        | <i>Gucy2c</i> <sup>-/-</sup> TCR $\alpha$ Usage |                    | <i>Gucy2c</i> <sup>-/-</sup> TCR $\beta$ Usage |                            |
|----------------------------------------------------|-------------------------------------------------|--------------------|------------------------------------------------|----------------------------|
|                                                    | CDR3                                            | V-J Usage          | CDR3                                           | V-D-J Usage                |
| 1                                                  | AVNMGYKLT                                       | TRAV6-2<br>TRAJ9   | ASSDPNSDYT                                     | TRBV13-1<br>TRBJ1-2        |
| 2                                                  | ALSDRTGNYKYV                                    | TRAV6D-7<br>TRAJ40 | ASSDPNTEVF                                     | TRBV13-1<br>TRBJ1-1        |
| 3                                                  | AAVTNAYKVI                                      | TRAV4D-3<br>TRAJ30 | ASSDPHSDYT                                     | TRBV13-1<br>TRBJ1-2        |
| 4                                                  | ALSDHQGGRALI                                    | TRAV6D-7<br>TRAJ15 | ASGRGDTQY                                      | TRBV29<br>TRBD1<br>TRBJ2-5 |
| 5                                                  | ALAPPSSAGNKLT                                   | TRAV6D-5<br>TRAJ17 | AWSRGTGGARGQDTQY                               | TRBV31<br>TRBD2<br>TRBJ2-5 |
| TCR 4A and TCR 5B VDJ usage are indicated by color |                                                 |                    |                                                |                            |

<sup>a</sup>The top 5 CDR3s ranked in Fig. 1 are shown with their V-J or V-D-J usage.

TCR 4A

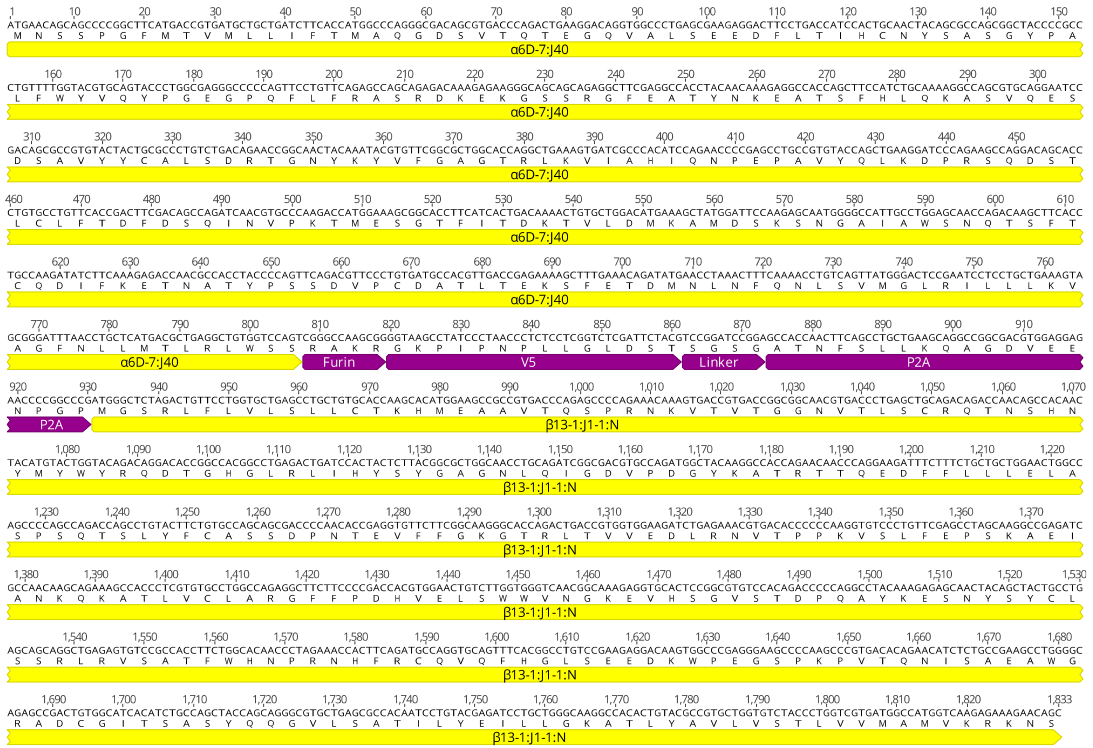

TCR 5B

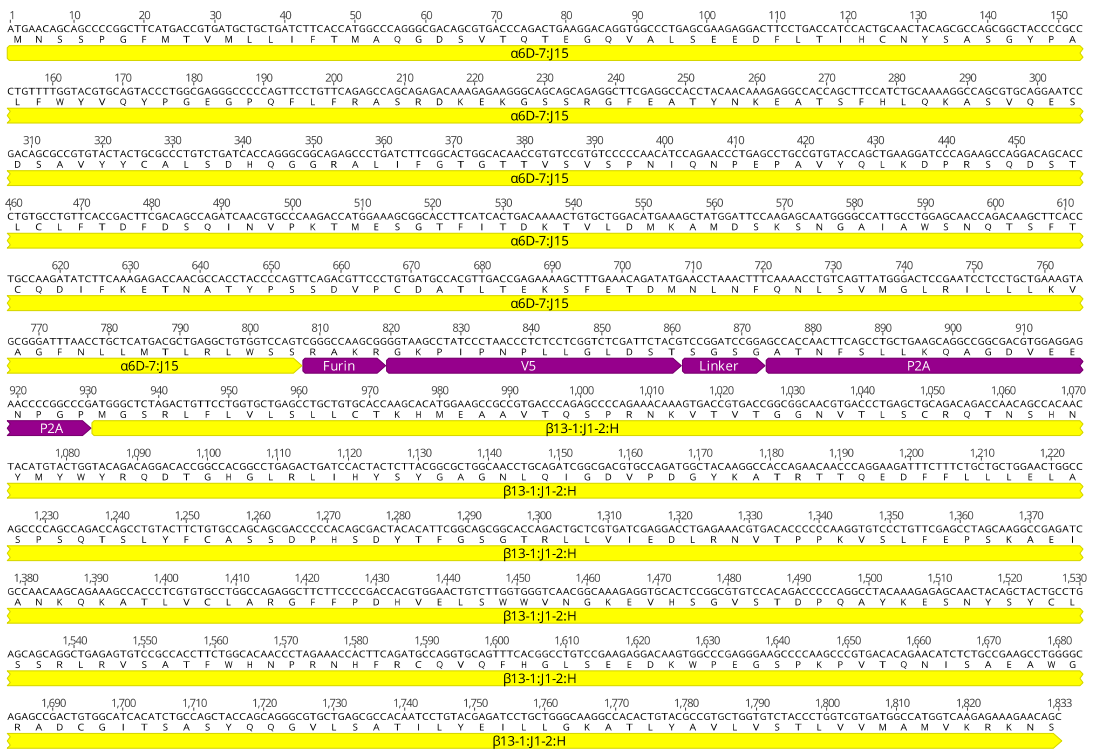

Supplemental Figure 1. TCR 4A and 5B Sequences.

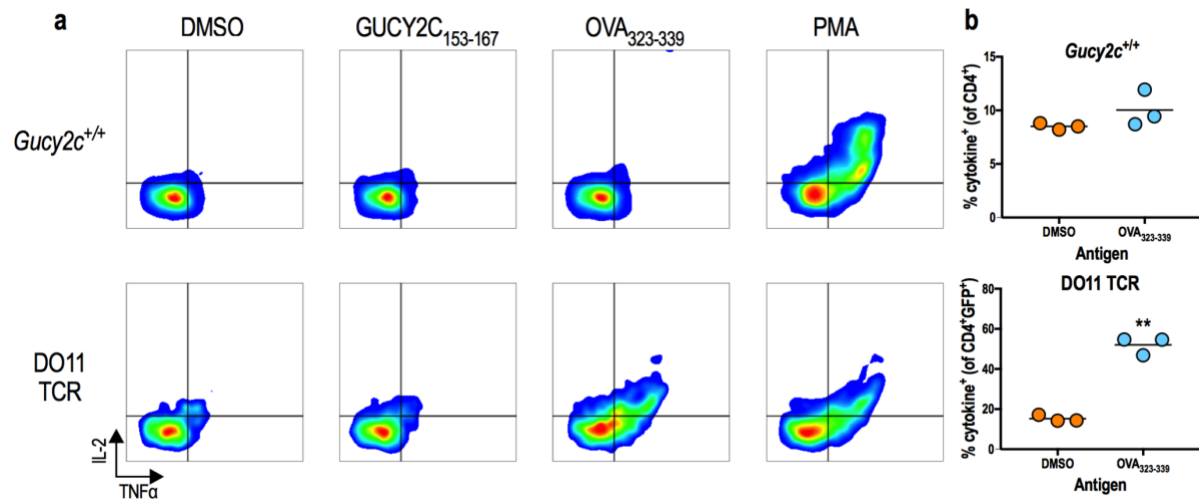

**Supplemental Figure 2. DO11 Retrogenic Immune Responses.** (a-b) Retrogenic mice produced with DO11 TCR and conventional *Gucy2c*<sup>+/+</sup> mice were immunized with Ad5-OVA. Splenocytes were collected 14 days later and analyzed by IL-2/TNFα ICS after stimulation with DMSO (vehicle), GUCY2C<sub>153-167</sub>, OVA<sub>323-339</sub> or PMA/IONO (positive control). Data indicate responses by individual mice and are representative of two experiments with 3 mice/group. \*\*  $p < 0.01$ , T-test.

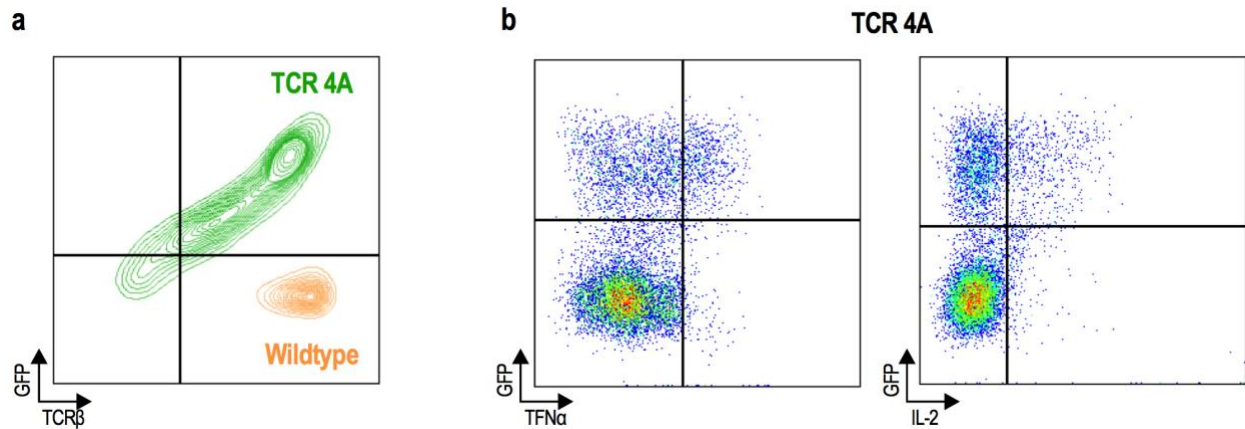

**Supplemental Figure 3. Relationship Between TCR Expression Levels and Cytokine Responses.** (a) CD4<sup>+</sup> T cells from *Gucy2c*<sup>-/-</sup> retrogenic mice produced with TCR 4A and conventional *Gucy2c*<sup>+/+</sup> mice were stained with anti-GFP and anti-TCRβ antibodies, demonstrating that TCR 4A T cells possess a continuum of TCR levels, with the highest expressers being similar to conventional CD4<sup>+</sup> T cells. (b) CD4<sup>+</sup> T cells from Ad5-GUCY2C-immunized *Gucy2c*<sup>-/-</sup> TCR 4A retrogenic mice were stimulated with GUCY2C<sub>153-167</sub> peptide and stained with anti-GFP, anti-TNFα, and anti-IL-2 antibodies (data from **Fig. 5** gated on CD4<sup>+</sup>GFP<sup>+</sup> cells). Here, data are gated on total CD4<sup>+</sup> T cells, demonstrating that cytokines are produced only by GFP<sup>hi</sup> cells. Data indicate responses by individual mice and are representative of two experiments with 3-5 mice/group.
